# Supplementary figures and images for: Chromatin endogenous cleavage provides a global view of yeast RNA polymerase II transcription kinetics
Source: eLife journal article supplement (doi:10.7554/elife.100764), 2024-09-23

Biological Replicate:           #1           #2           #3  
Duration 3-IAA (min):       0 10 20 30   0 10 20 30   0 10 20 30

Sua7-3xV5-IAA7

Actin

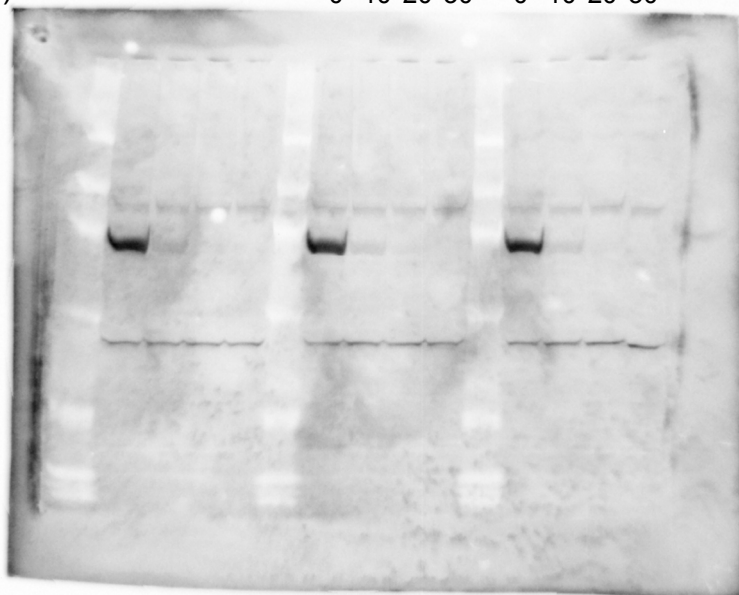

Supplement: fig5-data1 [file elife-100764-fig5-data1-v1.zip]
